# Supplementary material
Source: MDPI journal article supplement (https://www.mdpi.com/2411-5126/1/1/1)
Supplement: s1 [file s1]

Supplementary: Relevance of Reactive Fe:S Ratios for Sulfur Impacts on Arsenic Uptake by Rice

Kristin Boye 1,2*, Juan Lezama-Pacheco 2 and Scott Fendorf 2

1 Stanford Synchrotron Radiation Lightsource, SLAC National Accelerator Laboratory, Menlo Park, CA 94025, USA

2 Department of Earth System Science, Stanford University, Stanford, CA 94305, USA;
jlezama@stanford.edu (J.L.-P.); fendorf@stanford.edu (S.F.)

***** Correspondence: kboye@slac.stanford.edu; Tel.: +1-650-926-4946

**Table S1.** Soil properties as determined in triplicate samples (standard deviation in brackets)

| **Soil** | **Field location** | **Texturea** | **pHb** | **Total Cc**  **(%)** | **Total Nc**  **(%)** | **Total**  **Sd**  **(mg/kg)** | **Total Asd**  **(mg/kg)** | **Oxalate extractable Ase (µg/kg)** |
| --- | --- | --- | --- | --- | --- | --- | --- | --- |
| Leuk Daek | N 11°13.203’,  E 105°14.756’, elevation: 41 ft | Silty Clay Loam | 6.13  (0.01) | 1.60  (0.02) | 0.17  (0.00) | 330  (10) | 15.4  (0.9) | 111  (3) |
| Kien Svay | N 11°30.493’,  E 105°00.624’, elevation: 71 ft | Silty Clay Loam | 5.39  (0.02) | 1.30  (0.02) | 0.14  (0.00) | 363  (6) | 11.0  (0.6) | 66  (8) |

a hand textured

b in deionized water (1:5 soil:solution ratio)

c by combustion (Carlo-Erba NA 1500, Danvers, MA, USA)

d by X-ray fluorescence (Spectro XePositive HE XRF Spectrometer, AMETEK, Kleve, Germany)

e 0.2 M oxalate at pH 3.0 (procedure as in Rodriquez et al. 2003[[1]](#footnote-1))

**Table S2.** C, S, and As concentrations in soil samples from a small field survey in the Mekong delta of Cambodia and Vietnam, which was conducted to help guide the selection of soils to use for the experiment

| **Field location** | **Total C**  **(%)** | **Total S**  **(mg/kg)** | **Total As**  **(mg/kg)** |
| --- | --- | --- | --- |
| Rice Paddy, Kroh Sang, Cambodia | 0.8 | 180 | 3.1 |
| Rice Paddy, Kroh Sang, Cambodia | 1.0 | 220 | 6.4 |
| Rice Paddy, Takeo, Cambodia | 1.8 | 320 | 1.4 |
| Lotus pond, Takeo, Cambodia | 1.2 | 335 | 3.9 |
| Lotus pond, Kien Svay, Cambodia | 1.4 | 231 | 14.1 |
| Irrigated Rice Paddy, Vietnam | 1.2 | 225 | 11.9 |
| Acid Sulfate Soil, Vietnam | 9.4 | 8,498 | 17.6 |
| Acid Sulfate Soil, Vietnam | 13 | 9,832 | 16.7 |

XANES operational details:

Arsenic standards and sample spectra were obtained at SSRL beam line 11-2 and were energy calibrated to Au at 11919 eV. We used a Si (220) monochromator, detuned 35% at 12400 eV (for harmonic reduction). Samples were measured in fluorescence mode using a Ge 100 element detector at room temperature. Standards were measured in transmission mode.

Sulfur model spectra were taken from Almqvist et al., 2010[[2]](#footnote-2). Sample S XANES spectra were obtained at SSRL beam line 4-3, using a Si(111) monochromator and a Vortex detector (fluorescence mode). The samples were contained in a chamber under He atmosphere (slight continuous flow). Energy calibration was done with the in-line thiosulfate standard.

**Table S3.** Model compounds used for linear combination fitting of As and S XANES spectra from soils

| **Element** | **Species group** | **Nominal oxidation state** | **Model compound name** | **Model compound formula** | **Maximum peak**  **(Additional peak), eV** |
| --- | --- | --- | --- | --- | --- |
| As | As-S | +III | Trisphenylthioarsine | AsS3C18H15 | 11868.6 |
|  | Arsenite | +III | Sodium arsenic trioxide | NaAs2O3 | 11870.4 |
|  | Arsenate | +V | Arsenate adsorbed to ferrihydrite | AsO4-Fh | 11874.1 |
|  |  |  |  |  |  |
| S | Sulfide | -II | Pyrrhotite†† | FeS | 2470.6 |
|  | Disulfide | -I | L-Cystine | C6H12N2O4S2 | 2472.6 (2474.1) |
|  | Thiol | -II | Thiosalicylic acid | 2-HS(C6H4)COOH | 2473.5 |
|  | Sulfoxide | 0 | Dimethylsulfoxide | (CH3)2SO | 2476.4 |
|  | Sulfonate | +IV | Sodium methylsulfonate | NaCH3SO3 | 2481.1 |
|  | Organic sulfate | +VI | Chondroitin sulfate | C14H19NO14SNa2 | 2482.7 (2481.2) |
|  | Sulfate | +VI | Sodium sulfate | Na2SO4•10H2O | 2482.4 |

†As standards and samples were calibrated against Au at 11919 eV. We used a Si (220) monochromator, detuned 35% at 12400 eV (for harmonic reduction). Samples were measured in fluorescence mode using a Ge 100 element detector at room temperature. Standards were measured in transmission mode.

†† Although pyrrhotite was used as the model compound for fitting the most reduced sulfur peak, in natural soil systems this peak is most likely indicative of mackinawite, which is a pre-cursor for pyrite (FeS2) and commonly found in reduced environments, where it is known to react with As(III) through adsorption and/or precipitation.[[3]](#footnote-3),[[4]](#footnote-4)

**Table S4.** Linear regression fits of final plant As concentrations versus weekly soil solution concentrations (elemental symbol followed by number denoting weeks since start of experiment). Only significant fits are included (*p*-value < 0.05) and variables are listed in order of goodness of fit (highest R2, lowest *p*-value)

| **Y-variable** | **X-variable** | **R2** | ***p*-value** | **N** | **Nature of correlation** |
| --- | --- | --- | --- | --- | --- |
| As Grain | Fe21 | 0.38 | 0.008 | 17 | neg |
|  | Fe3 | 0.38 | 0.009 | 17 | neg |
|  | Fe19 | 0.36 | 0.012 | 17 | neg |
|  | Fe6 | 0.35 | 0.012 | 17 | neg |
|  | P6 | 0.26 | 0.036 | 17 | neg |
|  | P9 | 0.24 | 0.047 | 17 | neg |
|  | As15 | 0.22 | 0.037 | 17 | pos |
|  | As19 | 0.19 | 0.044 | 17 | pos |
|  |  |  |  |  |  |
| AsStraw | Fe21 | 0.45 | 0.003 | 17 | neg |
|  | Fe3 | 0.45 | 0.003 | 17 | neg |
|  | Fe19 | 0.42 | 0.005 | 17 | neg |
|  | P19 | 0.38 | 0.008 | 17 | neg |
|  | Fe6 | 0.35 | 0.012 | 17 | neg |
|  | Si11 | 0.29 | 0.024 | 17 | neg |
|  | P6 | 0.25 | 0.043 | 17 | neg |
|  | Si9 | 0.24 | 0.047 | 17 | neg |
|  |  |  |  |  |  |
| AsRoot | As15 | 0.89 | 0.002 | 10 | pos |
|  | Fe3 | 0.84 | 0.000 | 10 | neg |
|  | Fe19 | 0.81 | 0.000 | 10 | neg |
|  | Fe21 | 0.76 | 0.001 | 10 | neg |
|  | P19 | 0.71 | 0.002 | 10 | neg |
|  | As9 | 0.66 | 0.004 | 10 | pos |
|  | P11 | 0.66 | 0.005 | 10 | neg |
|  | As19 | 0.64 | 0.006 | 10 | pos |
|  | Fe11 | 0.59 | 0.009 | 10 | neg |
|  | As11 | 0.58 | 0.010 | 10 | pos |
|  | Si19 | 0.54 | 0.015 | 10 | pos |
|  | Si3 | 0.54 | 0.015 | 10 | pos |
|  | Fe6 | 0.50 | 0.023 | 10 | neg |
|  | P9 | 0.47 | 0.028 | 10 | neg |
|  | Fe15 | 0.46 | 0.030 | 10 | neg |
|  | P21 | 0.46 | 0.031 | 10 | neg |
|  | As21 | 0.45 | 0.034 | 10 | pos |
|  | Si21 | 0.41 | 0.046 | 10 | pos |

**Table S5.** Linear regression fits of total plant As uptake versus weekly soil solution concentrations (elemental symbol followed by number denoting weeks since start of experiment). Only significant fits are included (*p*-value < 0.05) and variables are listed in order of goodness of fit (highest R2, lowest *p*-value)

| **Y-variable** | **X-variable** | **R2** | **p-value** | **N** | **Nature of correlation** |
| --- | --- | --- | --- | --- | --- |
| Total As | P9 | 0.72 | 0.002 | 10 | neg |
|  | Fe15 | 0.70 | 0.002 | 10 | neg |
|  | P11 | 0.61 | 0.008 | 10 | neg |
|  | P15 | 0.54 | 0.016 | 10 | neg |
|  | P19 | 0.54 | 0.016 | 10 | neg |
|  | Fe3 | 0.52 | 0.019 | 10 | neg |
|  | Fe19 | 0.51 | 0.019 | 10 | neg |
|  | Fe21 | 0.50 | 0.022 | 10 | neg |
|  | P6 | 0.44 | 0.037 | 10 | neg |
|  | S3 | 0.01 | 0.018 | 10 | pos |

© 2017 by the authors. License MDPI, Basel, Switzerland. This article is an open access article distributed under the terms and conditions of the Creative Commons Attribution (CC BY) (http://creativecommons.org/licenses/by/4.0/).

1. Rodriguez, R. R.; Basta, N. T.; Casteel, S. W.; Armstrong, F. P.; Ward, D. C. Chemical extraction methods to assess bioavailable arsenic in soil and solid media. *J. Environ. Qual.* **2003,** *32*, 876-884. [↑](#footnote-ref-1)
2. Almkvist, G.; Boye, K.; Persson, I. K-edge XANES analysis of sulfur compounds: an investigation of the relative intensities using internal calibration. *J. Synchrotron Radiat.* **2010,** *17*(5)**,** 683–688. DOI 10.1107/S0909049510022946. [↑](#footnote-ref-2)
3. Jeong, H.Y.; Han, Y-S.; Hayes, K. F. X-ray absorption and X-ray photoelectron spectroscopic study of arsenic mobilization during mackinawite (FeS) oxidation. *Environ Sci Tech.* **2010**, *44* (3), 955-961. DOI 10.1021/es902577y. [↑](#footnote-ref-3)
4. Farquhar, M. L.; Charnock, J. M.; Livens, F. R.; Vaughan, D. J. Mechanisms of arsenic uptake from aqueous solution by interaction with goethite, lepidocrocite, mackinawite, and pyrite: an X-ray absorption spectroscopy study. *Environ Sci Tech.* **2002**, *36* (8), 1757-1762. [↑](#footnote-ref-4)
